# Supplementary material for: Multi-marker metabarcoding approach to study mesozooplankton at basin scale
Source: PubMed Central journal article supplement (PMC6092319; doi:10.1038/s41598-018-30157-7), 2018-08-14
Supplement: 41598_2018_30157_MOESM2_ESM.pdf [file 41598_2018_30157_MOESM2_ESM.pdf]

Supplementary Information for tables S1 – S3:

**Multi-marker metabarcoding approach to study mesozooplankton at basin scale**

Sergio Stefanni<sup>a\*</sup>, David Stanković<sup>b, c</sup>, Diego Borme<sup>d</sup>, Alessandra de Olazabal<sup>d</sup>, Tea Juretić<sup>d, e</sup>,  
Alberto Pallavicini<sup>b</sup>, Valentina Tirelli<sup>d</sup>.

**Affiliations:** <sup>a</sup>Stazione Zoologica Anton Dohrn, Villa Comunale, Naples, Italy; <sup>b</sup>Department of Life Sciences, University of Trieste, Via Licio Giorgieri 5, Trieste, Italy; <sup>c</sup>National Institute of Biology, Marine Biology Station, Fornače 41, Piran, Slovenia; <sup>d</sup>Istituto Nazionale di Oceanografia e di Geofisica Sperimentale (OGS), Via A. Piccard 54, Trieste, Italy; <sup>e</sup>Institute of Oceanography and Fisheries, Šetalište I. Meštrovića 63, Split, Croatia.

\*corresponding author

E-mail: [sergio.stefanni@szn.it](mailto:sergio.stefanni@szn.it)

| Phylum          | Order                      | Family                              | 0_NCBI TAXONOMY                        | COI 90% | COI 95% | COI 97% | 18S 95% | 18S 97% | 18S 99% | Notes (WoRMS, WRIMS, Razouls, FISHbase, literature, personal knowledge)                                    |                                                                                                                                     |
|-----------------|----------------------------|-------------------------------------|----------------------------------------|---------|---------|---------|---------|---------|---------|------------------------------------------------------------------------------------------------------------|-------------------------------------------------------------------------------------------------------------------------------------|
| Chaetognatha    | Aphragmophora              | Sagittidae                          | <i>Flaccisagitta enflata</i>           | X       | X       | X       | X       | X       | X       |                                                                                                            |                                                                                                                                     |
|                 |                            |                                     | <i>Parasagitta</i>                     |         |         |         | X       | X       | X       | 18S identified it as either P.elegans or P.megalopthalma, of which neither is present in the Mediterranean |                                                                                                                                     |
|                 |                            |                                     | <i>Parasagitta setosa</i>              | X       | X       | X       |         |         |         |                                                                                                            |                                                                                                                                     |
|                 |                            |                                     | <i>Aidanosagitta crassa</i>            |         |         |         | X       |         |         |                                                                                                            |                                                                                                                                     |
|                 |                            |                                     | <i>Aidanosagitta neglecta</i>          |         |         |         | X       | X       | X       | NIS                                                                                                        |                                                                                                                                     |
|                 |                            |                                     | <i>Decipisagitta decipiens</i>         |         |         |         |         | X       | +       |                                                                                                            |                                                                                                                                     |
|                 |                            | Krohnittidae                        | <i>Krohnitta pacifica</i>              |         |         |         | X       | X       | +       | not in Med                                                                                                 |                                                                                                                                     |
|                 | Elopiformes                | Megalopidae                         | <i>Megalops atlanticus</i>             |         |         |         | X       | X       | +       |                                                                                                            |                                                                                                                                     |
| Chordata        | Anguilliformes             | Congridae                           | <i>Bathyrcoconger parvibranchialis</i> | X       |         |         |         |         |         |                                                                                                            | Western Central Pacific                                                                                                             |
|                 |                            |                                     | <i>Trachurus mediterraneus</i>         | X       | X       | X       |         |         |         |                                                                                                            |                                                                                                                                     |
|                 | Carangiformes              | Carangidae                          | <i>Trachurus mediterraneus</i>         | X       | X       | X       |         |         |         |                                                                                                            |                                                                                                                                     |
|                 |                            |                                     | <i>Rhombosolea tapirina</i>            |         |         |         |         | X       |         |                                                                                                            | -                                                                                                                                   |
|                 | Pleuronectiformes          | Soleidae                            | <i>Pegusa impar</i>                    | X       | X       | X       |         |         |         |                                                                                                            |                                                                                                                                     |
|                 |                            |                                     | <i>Buglossidium luteum</i>             |         | X       | X       |         |         |         |                                                                                                            |                                                                                                                                     |
|                 |                            |                                     | <i>Cepola macrophthalmalma</i>         | X       | X       | X       |         |         |         |                                                                                                            |                                                                                                                                     |
|                 | Perciformes                | Cepolidae                           | <i>Trichopodus trichopterus</i>        |         |         |         | X       |         |         |                                                                                                            | Asian freshwater                                                                                                                    |
|                 |                            |                                     | <i>Antennarius pictus</i>              | X       |         |         |         |         |         |                                                                                                            | Indo-Pacific                                                                                                                        |
|                 |                            | Serranidae                          | <i>Serranus hepatus</i>                | X       | X       | X       |         |         |         |                                                                                                            |                                                                                                                                     |
|                 |                            |                                     | <i>Acanthopagrus butcheri</i>          |         |         |         | X       | X       | X       |                                                                                                            |                                                                                                                                     |
|                 |                            | Centracanthidae                     | <i>Spicara</i>                         | X       | X       | X       |         |         |         |                                                                                                            |                                                                                                                                     |
|                 | Gobiiformes                | Gobiidae                            | <i>Aphia minuta</i>                    | X       | X       | X       |         |         |         |                                                                                                            |                                                                                                                                     |
|                 |                            |                                     | <i>Gobius niger</i>                    | X       | X       | X       |         |         |         |                                                                                                            |                                                                                                                                     |
|                 | Atheriniformes             | Atherinopsidae                      | <i>Atherinella</i> sp. BOLD:AAZ7636    | X       |         |         |         |         |         |                                                                                                            | not in Med                                                                                                                          |
| Beloniformes    | Belonidae                  | <i>Belone belone</i>                | X                                      | X       | X       |         |         |         |         |                                                                                                            |                                                                                                                                     |
| Syngnathiformes | Mullidae                   | <i>Mullus barbatus</i>              | X                                      | X       | X       |         |         |         |         |                                                                                                            |                                                                                                                                     |
| Clupeiformes    | Clupeidae                  | <i>Sardina pilchardus</i>           | X                                      | X       |         |         |         | X       |         |                                                                                                            |                                                                                                                                     |
|                 |                            | <i>Potamalosa richmondia</i>        |                                        |         |         |         |         | X       |         | -                                                                                                          | not in Med (Australia)                                                                                                              |
|                 | Engraulidae                | <i>Anchoa hepsetus</i>              | X                                      |         |         |         |         |         |         |                                                                                                            | Central America                                                                                                                     |
|                 |                            | <i>Engraulis encrasicolus</i>       | X                                      | X       | X       | X       | X       | X       |         |                                                                                                            |                                                                                                                                     |
|                 |                            | <i>Engraulis australis</i>          |                                        | X       |         |         |         |         |         |                                                                                                            | they might appear due to the highintraspecific variability of COI for Engraulis                                                     |
|                 |                            |                                     | <i>Engraulis japonicus</i>             |         | X       |         |         |         |         |                                                                                                            | they might appear due to the highintraspecific variability of COI for Engraulis                                                     |
|                 |                            |                                     | <i>Engraulidae</i> sp. BOLD:AAG4822    | X       |         |         |         |         |         |                                                                                                            |                                                                                                                                     |
|                 |                            | <i>Styela</i>                       |                                        |         |         |         | X       |         |         |                                                                                                            |                                                                                                                                     |
| Tunicata        | Stolidobranchia            | Styelidae                           | <i>Styela plicata</i>                  | X       | X       | X       |         |         | +       | NIS potential for Adriatic (Venice Lagoon)                                                                 |                                                                                                                                     |
| Salpida         | Salpidae                   | <i>Thalia democratica</i>           |                                        |         |         | X       | X       |         |         |                                                                                                            |                                                                                                                                     |
|                 |                            | <i>Brooksia lacromae</i>            | X                                      |         |         | X       | X       |         |         |                                                                                                            |                                                                                                                                     |
|                 |                            | <i>Ritteriella retracta</i>         |                                        |         |         | X       |         |         |         |                                                                                                            |                                                                                                                                     |
|                 |                            | <i>Salpa maxima</i>                 |                                        |         |         | X       | X       |         |         |                                                                                                            |                                                                                                                                     |
| Copelata        | Oikopleuridae              | <i>Oikopleura dioica</i>            |                                        |         |         | X       | X       | X       |         |                                                                                                            |                                                                                                                                     |
|                 |                            | <i>Megalocercus huxleyi</i>         |                                        |         |         | X       | X       |         |         | not in Med                                                                                                 |                                                                                                                                     |
| Doliolida       | Doliolidae                 | <i>Dolioletta gegenbauri</i>        |                                        |         |         | X       |         |         |         |                                                                                                            |                                                                                                                                     |
|                 |                            | <i>Doliolum denticulatum</i>        |                                        |         |         | X       | X       |         |         |                                                                                                            |                                                                                                                                     |
|                 |                            | <i>Doliolum nationalis</i>          |                                        |         |         | X       | X       |         |         |                                                                                                            |                                                                                                                                     |
|                 |                            | <i>Gorgonocephalus eucnemis</i>     |                                        |         |         |         |         |         |         |                                                                                                            | not in Med                                                                                                                          |
| Echinodermata   | Euryalida                  | Gorgonocephalidae                   | <i>Gorgonocephalus eucnemis</i>        |         |         |         |         |         |         |                                                                                                            | not in Med                                                                                                                          |
|                 |                            |                                     | <i>Ophiothrix fragilis</i>             | X       | X       | X       | X       | X       |         |                                                                                                            |                                                                                                                                     |
|                 | Ophiotrichidae             | <i>Ophiothrix oerstedii</i>         |                                        |         |         | X       | X       |         |         | -                                                                                                          | not in Med (Gulf of Mexico)                                                                                                         |
|                 |                            | <i>Ophiocoma echinata</i>           |                                        |         |         | X       | X       |         |         | -                                                                                                          | not in Med (Gulf of Mexico)                                                                                                         |
|                 | Ophiocomidae               | <i>Ophiopsammus angusta</i>         | X                                      |         |         |         |         |         |         |                                                                                                            | New Zealand                                                                                                                         |
|                 |                            | <i>Ophiocten sericeum</i>           | X                                      |         |         |         |         |         |         |                                                                                                            | not in Med. (Arctic Ocean, North Atlantic Ocean, Canada, West Coast of England)                                                     |
|                 | Ophiuridae                 | <i>Ophioderma longicauda</i>        |                                        |         | X       |         |         |         |         |                                                                                                            |                                                                                                                                     |
|                 |                            | <i>Ophiomyxa</i>                    |                                        |         |         | X       |         |         |         |                                                                                                            |                                                                                                                                     |
|                 | Ophiomyxidae               | <i>Ophiocanops fugiens</i>          |                                        |         |         |         |         |         |         |                                                                                                            |                                                                                                                                     |
|                 |                            | <i>Amphipholis squamata</i>         |                                        |         |         | X       | X       |         |         |                                                                                                            |                                                                                                                                     |
| Amphiuridae     | <i>Amphiura abyssorum</i>  |                                     |                                        |         | X       | X       |         |         | +       | Most likely A.filiformis                                                                                   |                                                                                                                                     |
|                 | <i>Amphiura filiformis</i> | X                                   | X                                      | X       |         |         |         |         |         |                                                                                                            |                                                                                                                                     |
| Paxillosida     | Astropectinidae            | <i>Astropecten irregularis</i>      | X                                      | X       | X       |         |         |         |         |                                                                                                            |                                                                                                                                     |
| Clypeasteroidea | Echinocyamidae             | <i>Echinocyamus pusillus</i>        |                                        |         |         | X       | X       | X       |         |                                                                                                            |                                                                                                                                     |
|                 |                            | <i>Brissopsis lyrifera</i>          | X                                      | X       | X       |         |         |         |         |                                                                                                            |                                                                                                                                     |
| Spatangoida     | Eurypatagidae              | <i>Paramaretia multituberculata</i> | X                                      |         |         |         |         |         |         |                                                                                                            | not in Med (Australia)                                                                                                              |
|                 |                            | <i>Echinocardium cordatum</i>       | X                                      | X       | X       |         |         |         | +       |                                                                                                            |                                                                                                                                     |
| Camarodonta     | Parechinidae               | <i>Paracentrotus lividus</i>        | X                                      | X       | X       | X       | X       |         |         |                                                                                                            | According to 18S this species is either P.lividus or Sterechinus neumayeri, however S.neumayeri is not Present in the Mediterranean |

| Phylum          | Order           | Family               | 0_NCBI TAXONOMY                      | COI 90% | COI 95% | COI 97% | 18S 95% | 18S 97% | 18S 99% | Notes (WoRMS, WRIMS, Razouls, FISHbase, literature, personal knowledge)                                                                                                                                                                                                             |
|-----------------|-----------------|----------------------|--------------------------------------|---------|---------|---------|---------|---------|---------|-------------------------------------------------------------------------------------------------------------------------------------------------------------------------------------------------------------------------------------------------------------------------------------|
|                 |                 |                      | <i>Psammechinus miliaris</i>         | X       | X       | X       |         |         |         | not in Med                                                                                                                                                                                                                                                                          |
|                 |                 | Trigonocidaridae     | <i>Genocidaris maculata</i>          | X       | X       | X       |         |         |         |                                                                                                                                                                                                                                                                                     |
|                 |                 | Strongylocentrotidae | <i>Strongylocentrotus purpuratus</i> |         |         |         |         |         |         | not in Mediterranean                                                                                                                                                                                                                                                                |
|                 | Aspidochirotida | Holothuriidae        | <i>Holothuria</i>                    | X       | X       | X       | X       | X       | X       |                                                                                                                                                                                                                                                                                     |
|                 | Arbacioida      | Arbaciidae           | <i>Arbacia lixula</i>                |         | X       | X       | X       | X       | X       |                                                                                                                                                                                                                                                                                     |
|                 |                 |                      | <i>Tetrapygus niger</i>              | X       |         |         |         |         |         | not in Med (South Africa)                                                                                                                                                                                                                                                           |
| Hemichordata    | Enteropneusta   | Ptychoderidae        | <i>Tergivelum</i>                    |         |         |         |         |         |         |                                                                                                                                                                                                                                                                                     |
| Platyhelminthes | Polycladida     | Euryleptidae         | <i>Prostheceraeus vittatus</i>       |         |         |         | X       | X       |         |                                                                                                                                                                                                                                                                                     |
| Arthropoda      | Pantopoda       | Nymphonidae          | <i>Nymphon australe</i>              |         |         |         | X       | X       | +       | not in Med (South Pacific)                                                                                                                                                                                                                                                          |
|                 |                 | Pallenopsidae        | <i>Pallenopsis macneilli</i>         | X       |         |         |         |         |         | not in Med (Australia)                                                                                                                                                                                                                                                              |
|                 | Diplostraca     | Sididae              | <i>Penilia avirostris</i>            | X       | X       | X       | X       | X       |         |                                                                                                                                                                                                                                                                                     |
|                 |                 | Podonidae            | <i>Evadne spinifera</i>              | X       | X       | X       | X       | X       |         |                                                                                                                                                                                                                                                                                     |
|                 |                 |                      | <i>Evadne nordmanni</i>              |         |         |         |         |         |         |                                                                                                                                                                                                                                                                                     |
|                 |                 |                      | <i>Pleopis</i>                       | X       | X       | X       |         |         |         | The MOTU is recognized as either P.polyphemoides or as P.sp. BOLD:AAI2700                                                                                                                                                                                                           |
|                 |                 |                      | <i>Pseudevadne tergestina</i>        | X       | X       | X       |         |         |         |                                                                                                                                                                                                                                                                                     |
|                 |                 |                      | <i>Podon intermedius</i>             | X       | X       | X       | X       | X       | +       |                                                                                                                                                                                                                                                                                     |
|                 | Decapoda        | Penaeidae            | <i>Melicertus kerathurus</i>         | X       | X       | X       |         |         |         |                                                                                                                                                                                                                                                                                     |
|                 |                 |                      | <i>Parapenaeus longirostris</i>      | X       | X       | X       |         |         |         |                                                                                                                                                                                                                                                                                     |
|                 |                 |                      | <i>Penaeus japonicus</i>             |         |         |         | X       |         |         |                                                                                                                                                                                                                                                                                     |
|                 |                 | Sicyoniidae          | <i>Sicyonia laevigata</i>            |         |         |         | X       | X       | +       | not in Med (Gulf of Mexico). Possibly S. carinata                                                                                                                                                                                                                                   |
|                 |                 |                      | <i>Solenocera membranacea</i>        | X       | X       | X       |         |         |         |                                                                                                                                                                                                                                                                                     |
|                 |                 | Aegliidae            | <i>Aegla itacolomiensis</i>          | X       |         |         |         |         |         | Brazil freshwater                                                                                                                                                                                                                                                                   |
|                 |                 | Galatheididae        | <i>Galathea acis</i>                 | X       | X       | X       |         |         |         | not in Med                                                                                                                                                                                                                                                                          |
|                 |                 | Munididae            | <i>Munida rutilanti</i>              | X       | X       | X       | X       | X       | +       |                                                                                                                                                                                                                                                                                     |
|                 |                 | Lithodidae           | <i>Paralithodes camtschaticus</i>    | X       |         |         |         |         |         | not in Med                                                                                                                                                                                                                                                                          |
|                 |                 | Paguridae            | <i>Paguridae</i> sp. BOLD:ABW1528    | X       | X       |         |         |         |         |                                                                                                                                                                                                                                                                                     |
|                 |                 | Dorippoidea          | <i>Medorippe lanata</i>              |         | X       | X       |         |         |         |                                                                                                                                                                                                                                                                                     |
|                 |                 | Goneplacidae         | <i>Goneplax rhomboides</i>           | X       | X       |         |         |         |         |                                                                                                                                                                                                                                                                                     |
|                 |                 | Calappidae           | <i>Calappa granulata</i>             | X       | X       | X       |         |         |         |                                                                                                                                                                                                                                                                                     |
|                 |                 |                      | <i>Calappa gallus</i>                |         |         |         | X       |         |         | not in Med                                                                                                                                                                                                                                                                          |
|                 |                 |                      | <i>Cycloes granulosa</i>             |         |         |         |         |         |         | not in Med                                                                                                                                                                                                                                                                          |
|                 |                 |                      | <i>Hepatus epheliticus</i>           |         |         |         | X       | X       | -       | not in Med                                                                                                                                                                                                                                                                          |
|                 |                 | Leucosiidae          | <i>Ebalia cranchii</i>               | X       | X       | X       |         |         |         |                                                                                                                                                                                                                                                                                     |
|                 |                 | Epiplatidae          | <i>Taliepus dentatus</i>             | X       |         |         |         |         |         | not in Med                                                                                                                                                                                                                                                                          |
|                 |                 | Inachidae            | <i>Inachus dorsettensis</i>          | X       | X       | X       |         |         |         |                                                                                                                                                                                                                                                                                     |
|                 |                 | Parthenopidae        | <i>Parthenopoides massena</i>        | X       | X       | X       |         |         |         |                                                                                                                                                                                                                                                                                     |
|                 |                 |                      | <i>Enoplolambrus validus</i>         |         |         |         |         |         |         | not in Med (China)                                                                                                                                                                                                                                                                  |
|                 |                 |                      | <i>Derilambrus angulifrons</i>       | X       | X       | X       |         |         |         |                                                                                                                                                                                                                                                                                     |
|                 |                 | Majidae              | <i>Maja crispata</i>                 |         |         |         |         |         |         |                                                                                                                                                                                                                                                                                     |
|                 |                 | Pilumnidae           | <i>Pilumnus hirtellus</i>            | X       | X       | X       |         |         |         |                                                                                                                                                                                                                                                                                     |
|                 |                 | Polybiidae           | <i>Liocarcinus depurator</i>         | X       | X       | X       | X       | X       | X       |                                                                                                                                                                                                                                                                                     |
|                 |                 |                      | <i>Liocarcinus maculatus</i>         | X       | X       | X       | X       | X       | X       |                                                                                                                                                                                                                                                                                     |
|                 |                 |                      | <i>Liocarcinus marmoreus</i>         | X       | X       |         |         |         |         | not in Med                                                                                                                                                                                                                                                                          |
|                 |                 |                      | <i>Liocarcinus pusillus</i>          | X       |         |         |         |         |         |                                                                                                                                                                                                                                                                                     |
|                 |                 | Portunidae           | <i>Charybdis variegata</i>           |         |         |         | X       | X       | -       | not in Med (Subtropical. Indo-West Pacific: China, Taiwan and Japan)                                                                                                                                                                                                                |
|                 |                 | Xanthidae            | <i>Xantho pilipes</i>                | X       | X       | X       |         |         |         |                                                                                                                                                                                                                                                                                     |
|                 |                 |                      | <i>Ladomedaeus serratus</i>          |         |         |         | X       |         |         |                                                                                                                                                                                                                                                                                     |
|                 |                 |                      | <i>Micropanope pusilla</i>           |         |         |         |         | X       | -       | Gulf OF mexico; in MED M. Rufopunctata                                                                                                                                                                                                                                              |
|                 |                 | Erphioidea           | <i>Eriphides hispida</i>             |         |         |         |         | X       | -       | not in Med                                                                                                                                                                                                                                                                          |
|                 |                 |                      | <i>Cyclograpsus cinereus</i>         |         |         |         |         | X       | -       | not in Med (Pacific)                                                                                                                                                                                                                                                                |
|                 |                 | Varunidae            | <i>Gaetice depressus</i>             |         |         |         | X       | X       | -       | not in Med (Pacific)                                                                                                                                                                                                                                                                |
|                 |                 |                      | <i>Hemigrapsus</i>                   |         |         |         | X       | X       |         | According to 18S this species is either H.penicillatus or H.takanoi, but neither is present in Med. However, H.sanguineus is a NIB confirmed in the Adriatic (Schubart, 2003) and its 18S sequence is missing in the NCBI database.                                                 |
|                 |                 |                      | <i>Paragrapsus laevis</i>            |         |         |         | X       | X       |         |                                                                                                                                                                                                                                                                                     |
|                 |                 | Macrophthalmidae     | <i>Macrophthalmus japonicus</i>      |         |         |         | X       | X       | -       | not in Med (Pacific)                                                                                                                                                                                                                                                                |
|                 |                 | Ocypodidae           | <i>Ocypode quadrata</i>              |         |         |         | X       | X       | -       | not in Med                                                                                                                                                                                                                                                                          |
|                 |                 | Alpheidae            | <i>Alpheus</i>                       | X       | X       | X       |         |         |         | COI recognize this MOTU as A.glaber, while 18S recognized both as A.lobidens and A.dentipes or just as Alpheus; A.glaber and A.dentipes are reported from the Adriatic, while A.lobidens from the Levantine coast. The NCBI database holds records of other species for both genes. |
|                 |                 |                      | <i>Athanas nitescens</i>             | X       | X       | X       | X       | X       |         |                                                                                                                                                                                                                                                                                     |

| Phylum       | Order           | Family | 0_NCBI TAXONOMY                     | COI 90% | COI 95% | COI 97% | 18S 95% | 18S 97% | 18S 99% | Notes (WoRMS, WRIMS, Razouls, FISHbase, literature, personal knowledge)                                                                                                                                               |
|--------------|-----------------|--------|-------------------------------------|---------|---------|---------|---------|---------|---------|-----------------------------------------------------------------------------------------------------------------------------------------------------------------------------------------------------------------------|
|              |                 |        | <i>Synalpheus tjou</i>              | X       |         |         |         |         |         | not in Med (Australia)                                                                                                                                                                                                |
|              | Hippolytidae    |        | <i>Eualus cranchii</i>              | X       | X       | X       | X       | X       |         |                                                                                                                                                                                                                       |
|              | Acanthephyridae |        | <i>Ephyrina figueirai</i>           |         |         |         |         | X       | -       |                                                                                                                                                                                                                       |
|              | Pandalidae      |        | <i>Pandalus montagui</i>            |         |         |         |         | X       |         | not in Med (sub Arctic)                                                                                                                                                                                               |
|              | Crangonidae     |        | <i>Philocheirus bispinosus</i>      | X       | X       | X       |         |         |         |                                                                                                                                                                                                                       |
|              |                 |        | <i>Crangonidae</i> sp. BOLD:ACR5265 |         |         |         | X       |         |         |                                                                                                                                                                                                                       |
|              | Palaemonidae    |        | <i>Palaemon</i>                     | X       |         |         |         |         |         |                                                                                                                                                                                                                       |
|              | Processidae     |        | <i>Nikoides</i>                     | X       |         |         | X       | X       | +       | potential NIS: Genus not present in the MED; N. sibogae is ALIEN in the E. MED (Israel, 2014), where it was introduced from the Red Sea. The reference database is lacking both COI and 18S sequences from N. sibogae |
|              |                 |        | <i>Processa modica</i>              | X       | X       | X       |         |         |         |                                                                                                                                                                                                                       |
|              |                 |        | <i>Processa novveli</i>             | X       | X       | X       |         |         |         |                                                                                                                                                                                                                       |
|              | Laomedidae      |        | <i>Jaxea nocturna</i>               | X       | X       | X       |         | X       |         |                                                                                                                                                                                                                       |
|              | Upogebiidae     |        | <i>Upogebia acanthura</i>           |         |         |         | X       |         |         | not in Med                                                                                                                                                                                                            |
|              |                 |        | <i>Upogebia affinis</i>             |         |         |         | X       |         |         |                                                                                                                                                                                                                       |
|              |                 |        | <i>Upogebia deltaura</i>            | X       | X       | X       |         |         |         |                                                                                                                                                                                                                       |
| Euphausiacea | Euphausiidae    |        | <i>Nematoscelis megalops</i>        | X       | X       | X       |         |         |         |                                                                                                                                                                                                                       |
|              |                 |        | <i>Nyctiphanes australis</i>        | X       | X       |         |         |         |         | not in Med                                                                                                                                                                                                            |
|              |                 |        | <i>Nyctiphanes simplex</i>          | X       |         |         |         |         |         |                                                                                                                                                                                                                       |
|              |                 |        | <i>Thysanoessa</i>                  |         |         |         | X       | X       |         |                                                                                                                                                                                                                       |
|              |                 |        | <i>Thysanopoda aequalis</i>         |         |         |         | X       | X       |         |                                                                                                                                                                                                                       |
| Stomatopoda  | Squillidae      |        | <i>Squilla mantis</i>               | X       | X       | X       | X       | X       | X       | 18S could not distinguish between S.mantis, S.empusa and Kempella mikado, however only S.mantis is Present in the Med                                                                                                 |
| Amphipoda    | Hyperiidae      |        | <i>Themisto japonica</i>            | X       |         |         |         |         |         |                                                                                                                                                                                                                       |
|              |                 |        | <i>Themisto</i>                     |         |         |         | X       | X       | X       |                                                                                                                                                                                                                       |
|              |                 |        | <i>Themisto abyssorum</i>           |         |         |         |         | X       |         |                                                                                                                                                                                                                       |
|              |                 |        | <i>Themisto gaudichaudii</i>        | X       |         |         |         |         |         |                                                                                                                                                                                                                       |
|              |                 |        | <i>Themisto libellula</i>           | X       |         |         |         |         | X       | not in Med                                                                                                                                                                                                            |
|              | Phronimidae     |        | <i>Phronima bucephala</i>           | X       |         |         | X       | X       | +       |                                                                                                                                                                                                                       |
|              | Caprellidae     |        | <i>Pseudoprotella phasma</i>        |         |         |         |         |         |         |                                                                                                                                                                                                                       |
|              | Oxycephalidae   |        | <i>Cranoecephalus scleroticus</i>   |         |         |         |         |         |         |                                                                                                                                                                                                                       |
|              |                 |        | <i>Streetsia challengeri</i>        |         |         |         |         |         |         |                                                                                                                                                                                                                       |
|              | Aoridae         |        | <i>Aora gracilis</i>                |         |         |         | X       | X       |         |                                                                                                                                                                                                                       |
| Mysida       | Mysidae         |        | <i>Anchialina agilis</i>            |         |         |         | X       | X       |         |                                                                                                                                                                                                                       |
|              |                 |        | <i>Gastrosaccus spinifer</i>        |         |         |         | X       | X       |         |                                                                                                                                                                                                                       |
|              |                 |        | <i>Haplostylus dispar</i>           |         |         |         |         |         |         |                                                                                                                                                                                                                       |
|              |                 |        | <i>Erythroops</i>                   |         |         |         | X       | X       | -       |                                                                                                                                                                                                                       |
|              |                 |        | <i>Acanthomysis longicornis</i>     |         |         |         | X       | X       |         |                                                                                                                                                                                                                       |
|              |                 |        | <i>Diamysis mesohalobia</i>         |         |         |         | X       | X       | +       |                                                                                                                                                                                                                       |
|              |                 |        | <i>Siriella</i>                     |         |         |         |         |         |         |                                                                                                                                                                                                                       |
|              |                 |        | <i>Paramysis</i>                    |         |         |         | X       | X       | +       |                                                                                                                                                                                                                       |
|              |                 |        | <i>Bowmaniella</i> sp. EC1          |         |         |         | X       | X       | -       | not in Med                                                                                                                                                                                                            |
| Calanoida    | Acartiidae      |        | <i>Acartia (Acartiura) clausi</i>   | X       | X       | X       | X       | X       |         |                                                                                                                                                                                                                       |
|              |                 |        | <i>Acartia tonsa</i>                | X       | X       | X       |         |         |         |                                                                                                                                                                                                                       |
|              | Aetideidae      |        | <i>Pseudochirella obtusa</i>        | X       |         |         |         |         |         |                                                                                                                                                                                                                       |
|              | Calanidae       |        | <i>Calanus helgolandicus</i>        | X       | X       | X       | X       | X       |         |                                                                                                                                                                                                                       |
|              |                 |        | <i>Calanus euxinus</i>              |         |         | X       |         |         |         |                                                                                                                                                                                                                       |
|              |                 |        | <i>Calanus finmarchicus</i>         |         |         |         | X       | X       | +       |                                                                                                                                                                                                                       |
|              |                 |        | <i>Calanus jashnovi</i>             |         |         |         | X       | X       | +       |                                                                                                                                                                                                                       |
|              |                 |        | <i>Calanus sinicus</i>              |         |         |         |         | X       | -       |                                                                                                                                                                                                                       |
|              |                 |        | <i>Ctenocalanus vanus</i>           | X       | X       | X       |         |         |         |                                                                                                                                                                                                                       |
|              |                 |        | <i>Mesocalanus tenuicornis</i>      | X       | X       | X       |         | X       | +       |                                                                                                                                                                                                                       |
|              |                 |        | <i>Nannocalanus minor</i>           | X       | X       | X       |         |         |         |                                                                                                                                                                                                                       |
|              | Calocalanidae   |        | <i>Calocalanus contractus</i>       | X       | X       | X       |         |         |         |                                                                                                                                                                                                                       |
|              |                 |        | <i>Calocalanus</i> sp. 2 AC-2013    | X       |         |         |         |         |         |                                                                                                                                                                                                                       |
|              |                 |        | <i>Calocalanus</i> sp. 1 AC-2013    | X       |         |         |         |         |         |                                                                                                                                                                                                                       |
|              | Candaciidae     |        | <i>Candacia armata</i>              |         |         |         | X       | X       |         |                                                                                                                                                                                                                       |
|              | Centropagidae   |        | <i>Centropages</i>                  |         |         |         | X       | X       | X       | 18S cannot distinguish between C.typicus, C.hamatus and C.abdominalis in all reads. While the first two Are present in the Med C.abdominalis is not.                                                                  |
|              |                 |        | <i>Isias clavipes</i>               |         |         |         | X       | X       |         |                                                                                                                                                                                                                       |
|              | Clausocalanidae |        | <i>Clausocalanus arcuicornis</i>    | X       | X       | X       |         |         |         |                                                                                                                                                                                                                       |

| Phylum | Order             | Family          | 0_NCBI TAXONOMY                             | COI 90% | COI 95% | COI 97% | 18S 95% | 18S 97% | 18S 99% | Notes (WoRMS, WRIMS, Razouls, FISHbase, literature, personal knowledge) |
|--------|-------------------|-----------------|---------------------------------------------|---------|---------|---------|---------|---------|---------|-------------------------------------------------------------------------|
|        |                   |                 | <i>Clausocalanus furcatus</i>               | X       | X       | X       |         |         |         |                                                                         |
|        |                   |                 | <i>Clausocalanus jobei</i>                  | X       | X       | X       |         |         |         |                                                                         |
|        |                   |                 | <i>Clausocalanus parapergens</i>            | X       | X       |         |         |         |         |                                                                         |
|        |                   |                 | <i>Clausocalanus paululus</i>               | X       | X       | X       |         |         |         |                                                                         |
|        |                   |                 | <i>Clausocalanus pergens</i>                | X       | X       | X       |         |         |         |                                                                         |
|        |                   |                 | <i>Pseudocalanus minutus</i>                | X       |         |         |         |         |         | not in Med                                                              |
|        |                   |                 | <i>Pseudocalanus elongatus</i>              | X       | X       | X       |         | X       |         |                                                                         |
|        |                   |                 | <i>Pseudocalanus moultoni</i>               |         |         |         | X       | X       | +       | not in Med                                                              |
|        |                   |                 | <i>Microcalanus</i> sp. AC-2010             |         |         |         | X       | X       | -       |                                                                         |
|        | Diaixidae         |                 | <i>Diaixis hibernica</i>                    | X       | X       | X       |         |         |         |                                                                         |
|        | Euchaetidae       |                 | <i>Paraeuchaeta hebes</i>                   | X       | X       | X       |         |         |         |                                                                         |
|        | Metridinidae      |                 | <i>Pleuromamma gracilis</i>                 | X       | X       | X       |         |         |         |                                                                         |
|        |                   |                 | <i>Pleuromamma robusta</i>                  |         |         |         | X       | X       | X       |                                                                         |
|        | Paracalanidae     |                 | <i>Paracalanus aculeatus</i>                | X       |         |         |         |         |         |                                                                         |
|        |                   |                 | <i>Paracalanus aff. indicus</i> AC-2013     | X       | X       | X       |         |         |         |                                                                         |
|        |                   |                 | <i>Paracalanus nanus</i>                    | X       | X       | X       |         |         |         |                                                                         |
|        |                   |                 | <i>Paracalanus indicus</i>                  |         | X       | X       |         |         |         |                                                                         |
|        |                   |                 | <i>Paracalanus parvus</i>                   | X       | X       | X       | X       | X       |         |                                                                         |
|        |                   |                 | <i>Paracalanus quasimodo</i>                | X       | X       | X       |         |         |         |                                                                         |
|        | Pontellidae       |                 | <i>Pontella</i>                             |         |         |         | X       | X       | +       |                                                                         |
|        |                   |                 | <i>Anomalocera patersoni</i>                |         |         |         | X       |         |         |                                                                         |
|        | Pseudodiaptomidae |                 | <i>Pseudodiaptomus marinus</i>              | X       | X       | X       | X       | X       | +       | NIS                                                                     |
|        | Lucicutiidae      |                 | <i>Lucicutia flavicornis</i>                | X       | X       | X       |         |         |         |                                                                         |
|        | Temoridae         |                 | <i>Temora</i>                               |         |         |         | X       | X       | X       |                                                                         |
|        |                   |                 | <i>Temora longicornis</i>                   | X       | X       | X       |         |         |         |                                                                         |
|        |                   |                 | <i>Temora stylifera</i>                     | X       | X       | X       |         |         |         |                                                                         |
|        | Ridgewayiidae     |                 | <i>Exumella mediterranea</i>                |         |         |         |         |         |         |                                                                         |
|        | Cyclopoida        | Cyclopidae      | <i>Tritia</i>                               | X       | X       | X       |         |         |         |                                                                         |
|        |                   |                 | <i>Diacyclops bisetosus</i>                 |         |         |         |         |         |         |                                                                         |
|        | Oithonidae        |                 | <i>Oithona similis</i>                      | X       | X       | X       | X       | X       |         |                                                                         |
|        |                   |                 | <i>Oithona nana</i>                         |         |         |         | X       | X       |         |                                                                         |
|        |                   |                 | <i>Oithona davisae</i>                      |         | X       | X       |         |         |         |                                                                         |
|        |                   |                 | <i>Oithona simplex</i>                      |         |         |         |         |         |         |                                                                         |
|        |                   |                 | <i>Oithona</i> sp. 1 New Caledonia-RJH-2001 |         |         |         |         |         |         |                                                                         |
|        |                   |                 | <i>Oithona</i> sp. 2 New Caledonia-RJH-2004 |         |         |         | X       |         |         |                                                                         |
|        |                   |                 | <i>Dioithona oculata</i>                    |         |         |         | X       |         |         |                                                                         |
|        | Harpacticoida     | Euterpinidae    | <i>Euterpina acutifrons</i>                 | X       | X       | X       | X       | X       |         |                                                                         |
|        |                   | Ectinosomatidae | <i>Bradya</i> sp. Greenland-RJH-2004        |         |         |         |         |         |         |                                                                         |
|        |                   | Canuellidae     | <i>Canuella perplexa</i>                    |         |         |         | X       | X       | +       | Transition waters                                                       |
|        |                   | Peltidiidae     | <i>Peltidium</i> sp. New Caledonia-RJH-2007 |         |         |         |         |         |         |                                                                         |
|        | Poecilostomatoida | Oncaeidae       | <i>Goniopsyllus rostratus</i>               | X       | X       | X       |         |         |         |                                                                         |
|        |                   |                 | <i>Oncaea cf. mediterranea</i> 'broad form' | X       | X       |         |         |         |         |                                                                         |
|        |                   |                 | <i>Oncaea scottodicaloi</i>                 | X       | X       | X       |         |         |         |                                                                         |
|        |                   |                 | <i>Oncaea venusta</i>                       | X       | X       | X       |         | X       |         |                                                                         |
|        |                   |                 | <i>Oncaea waldemari</i>                     | X       | X       | X       |         |         |         |                                                                         |
|        |                   |                 | <i>Oncaea</i> sp. MVZ-2013                  |         |         |         | X       | X       | +       |                                                                         |
|        |                   |                 | <i>Triconia elongata</i>                    | X       | X       | X       |         |         |         |                                                                         |
|        |                   |                 | <i>Triconia umerus</i>                      | X       | X       | X       |         |         |         |                                                                         |
|        |                   | Corycaeidae     | <i>Ditrichocorycaeus anglicus</i>           | X       | X       | X       |         |         |         |                                                                         |
|        | Siphonostomatoida | Pennellidae     | <i>Lernaeocera branchialis</i>              |         |         |         | X       |         |         |                                                                         |
|        | Sessilia          | Balanidae       | <i>Amphibalanus amphitrite</i>              | X       | X       | X       |         |         |         |                                                                         |
|        |                   |                 | <i>Amphibalanus improvisus</i>              | X       | X       | X       |         |         |         |                                                                         |
|        |                   |                 | <i>Amphibalanus</i> sp. OPC-2014            | X       | X       | X       |         |         |         | not in Med                                                              |
|        |                   |                 | <i>Balanus trigonus</i>                     | X       | X       | X       |         |         |         |                                                                         |
|        |                   | Chthamalidae    | <i>Chthamalus stellatus</i>                 | X       | X       | X       |         |         |         |                                                                         |
|        |                   | Coronulidae     | <i>Chelonibia testudinaria</i>              | X       | X       | X       |         |         |         |                                                                         |
|        |                   | Pyrgomatidae    | <i>Ceratoconcha domingensis</i>             | X       |         |         |         |         |         | not in Med                                                              |
|        | Halocyprida       | Halocyprididae  | <i>Conchoecia</i> sp. SN008                 |         |         |         | X       |         |         | not in Med                                                              |
|        |                   |                 | <i>Conchoecia</i> sp. OC-2001               |         |         |         | X       |         |         |                                                                         |
|        |                   |                 | <i>Archiconchoecia striata</i>              | X       | X       | X       |         |         |         |                                                                         |

| Phylum     | Order            | Family            | 0_NCBI TAXONOMY                           | COI 90% | COI 95% | COI 97% | 18S 95% | 18S 97% | 18S 99% | Notes (WoRMS, WRIMS, Razouls, FISHbase, literature, personal knowledge)                                                                                                                                                                                          |
|------------|------------------|-------------------|-------------------------------------------|---------|---------|---------|---------|---------|---------|------------------------------------------------------------------------------------------------------------------------------------------------------------------------------------------------------------------------------------------------------------------|
|            |                  |                   | <i>Metaconchecia skogsbergi</i>           | X       |         |         |         |         |         |                                                                                                                                                                                                                                                                  |
|            |                  |                   | <i>Porroecia spinirostris</i>             | X       | X       | X       |         |         |         | not in Med                                                                                                                                                                                                                                                       |
|            |                  |                   | <i>Procerocacia microprocera</i>          | X       | X       | X       |         |         |         | not in Med                                                                                                                                                                                                                                                       |
| Annelida   | Diptera          | Chironomidae      | <i>Chironomus salinarius</i>              | X       | X       | X       |         |         |         | Ali et al. 1985 (J Am Mosq Control Asso)                                                                                                                                                                                                                         |
|            | Eunicida         | Eunicidae         | <i>Eunice roussaei</i>                    | X       | X       | X       |         |         |         |                                                                                                                                                                                                                                                                  |
|            |                  |                   | <i>Marphysa sanguinea</i>                 | X       |         |         |         |         |         |                                                                                                                                                                                                                                                                  |
|            | Amphinomida      | Euphosinidae      | <i>Euphosine armadillo</i>                |         |         |         |         | X       |         | -                                                                                                                                                                                                                                                                |
|            | Phyllococida     | Phyllococidae     | <i>Alitta succinea</i>                    |         |         |         | X       |         |         |                                                                                                                                                                                                                                                                  |
|            |                  |                   | <i>Phyllococidae sp. BMOO-13076</i>       | X       |         |         |         |         |         | not in Med                                                                                                                                                                                                                                                       |
|            |                  |                   | <i>Phyllodoce groenlandica</i>            |         |         |         | X       | X       |         |                                                                                                                                                                                                                                                                  |
|            |                  |                   | <i>Phyllodoce longipes</i>                |         |         |         |         | X       |         | +                                                                                                                                                                                                                                                                |
|            |                  |                   | <i>Pseudomystides bathysiphonicola</i>    |         |         |         |         | X       |         | Not reported from Med.                                                                                                                                                                                                                                           |
|            |                  |                   | <i>Glycera</i>                            |         |         |         | X       |         |         |                                                                                                                                                                                                                                                                  |
|            |                  |                   | <i>Glycera alba</i>                       |         |         |         |         | X       |         |                                                                                                                                                                                                                                                                  |
|            |                  |                   | <i>Eteone longa</i>                       |         |         |         | X       |         |         |                                                                                                                                                                                                                                                                  |
|            | Lopadorrhynchida | Lopadorrhynchidae | <i>Pelagobia cf. longicirrata OK-2012</i> |         |         |         |         | X       |         | -                                                                                                                                                                                                                                                                |
|            |                  | Pilargidae        | <i>Ancistrosyllis sp. AAN-2002</i>        |         |         |         | X       |         |         | not in Med (California)                                                                                                                                                                                                                                          |
|            |                  |                   | <i>Sigambra sp. BC-2003</i>               |         |         |         | X       | X       |         |                                                                                                                                                                                                                                                                  |
|            |                  | Nereididae        | <i>Hediste diversicolor</i>               | X       | X       | X       |         |         |         |                                                                                                                                                                                                                                                                  |
|            |                  | Polynoidae        | <i>Austrolaenilla pelagica</i>            | X       |         |         |         |         |         | not in Med                                                                                                                                                                                                                                                       |
|            |                  |                   | <i>Lepidonotus</i>                        |         |         |         |         | X       | X       |                                                                                                                                                                                                                                                                  |
|            |                  | Tomopteridae      | <i>Tomopteris</i>                         | X       |         |         | X       |         |         |                                                                                                                                                                                                                                                                  |
|            |                  | Sigalionidae      | <i>Sigalion spinosus</i>                  |         |         |         | X       | X       |         | +                                                                                                                                                                                                                                                                |
|            | Sabellida        | Sabellidae        | <i>Amphicorina</i>                        |         |         |         | X       |         |         |                                                                                                                                                                                                                                                                  |
|            |                  | Oweniidae         | <i>Owenia fusiformis</i>                  | X       | X       | X       | X       | X       |         |                                                                                                                                                                                                                                                                  |
|            |                  | Sabellariidae     | <i>Sabellaria alveolata</i>               |         |         |         | X       | X       |         | +                                                                                                                                                                                                                                                                |
|            |                  |                   | <i>Sabellaria spinulosa</i>               | X       | X       | X       |         |         |         |                                                                                                                                                                                                                                                                  |
|            | Spionida         | Spionidae         | <i>Polydora cornuta</i>                   | X       | X       | X       | X       | X       | X       | According to 18S this is <i>P.brevipalpa</i> , while it is either <i>P.haswelli</i> (95%) or <i>P.comuta</i> (95%, 97%) according to COI. While all the species are not native in the Med, only <i>P.cornuta</i> is reported as a NIS here (including Adriatic). |
|            |                  |                   | <i>Prionospio dubia</i>                   |         |         |         | X       | X       |         | -                                                                                                                                                                                                                                                                |
|            |                  |                   | <i>Spio sp. LK-2011-1</i>                 |         |         |         | X       | X       |         | +                                                                                                                                                                                                                                                                |
|            |                  |                   | <i>Spionidae sp. BMOO-13880</i>           | X       |         |         |         |         |         |                                                                                                                                                                                                                                                                  |
|            |                  |                   | <i>Spiophanes</i>                         |         |         |         |         |         |         |                                                                                                                                                                                                                                                                  |
|            |                  |                   | <i>Spiophanes kroyeri</i>                 |         |         |         |         | X       |         |                                                                                                                                                                                                                                                                  |
|            |                  |                   | <i>Spiophanes bombyx</i>                  |         |         |         | X       |         |         |                                                                                                                                                                                                                                                                  |
|            |                  |                   | <i>Boccardiella ligerica</i>              |         |         |         |         |         |         |                                                                                                                                                                                                                                                                  |
|            |                  |                   | <i>Aurospio dibranchiata</i>              |         |         |         |         | X       |         | -                                                                                                                                                                                                                                                                |
|            | Magelonidae      |                   | <i>Magelona sp VR-2004</i>                |         |         |         | X       | X       |         | +                                                                                                                                                                                                                                                                |
|            | Poecilochaetidae |                   | <i>Poecilochaetus serpens</i>             | X       | X       | X       | X       | X       | X       |                                                                                                                                                                                                                                                                  |
|            |                  |                   | <i>Poecilochaetus sp. VR-2006</i>         |         |         |         | X       | X       |         |                                                                                                                                                                                                                                                                  |
|            | Ophelida         | Ophelidae         | <i>Ophelina/Armandia</i>                  |         |         |         | X       | X       | X       |                                                                                                                                                                                                                                                                  |
|            |                  |                   | <i>Polyophthalmus pictus</i>              |         |         |         | X       | X       | X       |                                                                                                                                                                                                                                                                  |
|            | Capitellida      | Capitellidae      | <i>Capitella capitata CMC02</i>           | X       |         |         |         |         |         |                                                                                                                                                                                                                                                                  |
|            |                  | Maldanidae        | <i>Asychis disparidentata</i>             |         |         |         | X       |         |         | not in Med                                                                                                                                                                                                                                                       |
|            |                  | Chaetopteridae    | <i>Mesochaetopterus taylori</i>           |         |         |         |         |         |         |                                                                                                                                                                                                                                                                  |
|            |                  |                   | <i>Chaetopterus cf. luteus KJO-2005</i>   |         |         |         | X       | X       |         | -                                                                                                                                                                                                                                                                |
|            |                  |                   | <i>Telepsavus sp. BVB-2002</i>            |         |         |         | X       | X       |         | +                                                                                                                                                                                                                                                                |
|            | Terbellida       | Terbelidae        | <i>Lanice conchilega</i>                  |         |         |         | X       | X       |         |                                                                                                                                                                                                                                                                  |
|            |                  | Cirratulidae      | <i>Tharyx sp. THS-2012</i>                |         |         |         |         | X       |         | -                                                                                                                                                                                                                                                                |
| Brachipoda | Golfingiida      | Sipunculidae      | <i>Sipunculus nudus</i>                   | X       | X       | X       | X       | X       |         |                                                                                                                                                                                                                                                                  |
|            |                  |                   | <i>Phoronis hippocrepeia</i>              |         |         |         | X       | X       |         |                                                                                                                                                                                                                                                                  |
|            |                  |                   | <i>Phoronis muelleri</i>                  |         |         |         | X       | X       |         |                                                                                                                                                                                                                                                                  |
| Bryozoa    | Ctenostomatidae  | Flustrellidridae  | <i>Flustrellidra armata</i>               | X       |         |         |         |         |         | doubt in Med                                                                                                                                                                                                                                                     |
| Mollusca   | Anomalodesmata   | Cupispidariidae   | <i>Cupispidaria cupispidata</i>           | X       | X       | X       |         |         |         |                                                                                                                                                                                                                                                                  |
|            |                  | Corbulidae        | <i>Corbula gibba</i>                      | X       | X       | X       |         |         |         |                                                                                                                                                                                                                                                                  |
|            | Myida            | Hiatellidae       | <i>Hiatella</i>                           |         |         |         | X       | X       |         | +                                                                                                                                                                                                                                                                |
|            |                  |                   | <i>Hiatella sp. D HML-2015</i>            | X       | X       | X       |         |         |         |                                                                                                                                                                                                                                                                  |
|            |                  | Placunidae        | <i>Placuna placenta</i>                   |         |         |         | X       | X       |         |                                                                                                                                                                                                                                                                  |
|            |                  | Teredinidae       | <i>Lyrodus/Bankia</i>                     |         |         |         | X       | X       | X       | According to 18S this MOTU is either <i>Lyrodus pedicellatus</i> or <i>Bankia carinata</i> . However, NCBI Database also holds COI sequences for both species.                                                                                                   |

| Phylum          | Order              | Family | 0_NCBI TAXONOMY                        | COI 90% | COI 95% | COI 97% | 18S 95% | 18S 97% | 18S 99% | Notes (WoRMS, WRIMS, Razouls, FISHbase, literature, personal knowledge)                                                                                                                                                                                                                           |
|-----------------|--------------------|--------|----------------------------------------|---------|---------|---------|---------|---------|---------|---------------------------------------------------------------------------------------------------------------------------------------------------------------------------------------------------------------------------------------------------------------------------------------------------|
| Adapedonta      | Pharidae           |        | <i>Ensis magnus</i>                    | X       |         |         |         |         |         |                                                                                                                                                                                                                                                                                                   |
| Veneroida       | Veneridae          |        | <i>Ruditapes philippinarum</i>         | X       | X       | X       |         | X       | +       | NIS                                                                                                                                                                                                                                                                                               |
|                 |                    |        | <i>Timoclea ovata</i>                  | X       | X       | X       |         |         |         |                                                                                                                                                                                                                                                                                                   |
|                 | Pharidae           |        | <i>Phaxas pellucidus</i>               |         |         | X       | X       |         |         |                                                                                                                                                                                                                                                                                                   |
| "Imparidentia"  | Montacutidae       |        | <i>Kurtiella bidentata</i>             | X       |         | X       |         |         |         |                                                                                                                                                                                                                                                                                                   |
|                 | Gastrochaenidae    |        | <i>Gastrochaena dubia</i>              | X       | X       | X       | X       | X       |         |                                                                                                                                                                                                                                                                                                   |
| Cardiida        | Semelidae          |        | <i>Abra alba</i>                       | X       |         | X       |         | X       | X       |                                                                                                                                                                                                                                                                                                   |
|                 | Cardiidae          |        | <i>Vasticardium</i>                    |         |         | X       | X       | X       |         |                                                                                                                                                                                                                                                                                                   |
|                 |                    |        | <i>Parvicardium minimum</i>            |         |         | X       | X       | X       |         |                                                                                                                                                                                                                                                                                                   |
|                 | Tellinidae         |        | <i>Iridona iridescens</i>              |         |         |         | X       | X       | X       | Not reported in Med                                                                                                                                                                                                                                                                               |
| Arcida          | Arcidae            |        | <i>Anadara transversa</i>              | X       | X       | X       |         |         | +       | NIS                                                                                                                                                                                                                                                                                               |
|                 |                    |        | <i>Tegillarca nodifera</i>             |         |         |         |         | X       | -       |                                                                                                                                                                                                                                                                                                   |
|                 | Noetiidae          |        | <i>Estellarca olivacea</i>             |         |         |         |         | X       | -       |                                                                                                                                                                                                                                                                                                   |
|                 |                    |        |                                        |         |         |         |         |         |         | According to 18S this MOTU is either <i>Lasaea rubra</i> or <i>Kellia cf. jacksoniana</i> . While <i>L. rubra</i> is present in the Adriatic, the genus <i>Kellia</i> is not native in the Mediterranean; however <i>K. suborbicularis</i> is reported to be present in the Mediterranean as NIS. |
| "Imparidentia"  | Lasaeidae/Kellidae |        | <i>Lasaea/Kellia</i>                   |         |         |         | X       | X       |         |                                                                                                                                                                                                                                                                                                   |
|                 | Montacutidae       |        | <i>Mysella vitrea</i>                  |         |         | X       | X       | X       |         |                                                                                                                                                                                                                                                                                                   |
|                 |                    |        | <i>Tellmya ferruginosa</i>             |         |         | X       | X       | X       | X       |                                                                                                                                                                                                                                                                                                   |
| Limoida         | Limidae            |        | <i>Limaria hians</i>                   | X       | X       | X       | X       |         |         |                                                                                                                                                                                                                                                                                                   |
| Mytiloidea      | Mytilidae          |        | <i>Mytilus</i>                         |         |         |         | X       | X       |         |                                                                                                                                                                                                                                                                                                   |
|                 |                    |        | <i>Arcuatula senhousia</i>             |         |         |         |         | X       | X       | NIS                                                                                                                                                                                                                                                                                               |
|                 |                    |        | <i>Modiolus</i>                        | X       |         |         | X       | X       |         | According to COI this MOTU belongs to <i>M. phaesolina</i> , while 18S recognized it as either <i>M. americanus</i> , <i>M. rufus</i> or <i>M. modiolus</i> . Of these only the last species is reported for the Med and is a potential NIS.                                                      |
|                 |                    |        | <i>Musculus discors / M. lateralis</i> |         |         |         | X       | X       |         |                                                                                                                                                                                                                                                                                                   |
|                 |                    |        | <i>Adula falcatoides</i>               |         |         |         |         | X       | -       | not in Med (Pacific)                                                                                                                                                                                                                                                                              |
| Ostreoida       |                    |        | <i>Hyotissa hyotis / H. mcgintyi</i>   |         |         |         | X       | X       | +       | potential NIS                                                                                                                                                                                                                                                                                     |
|                 | Gryphaeidae        |        | <i>Neopycnodonte cochlear</i>          | X       | X       | X       |         |         |         |                                                                                                                                                                                                                                                                                                   |
|                 | Ostreidae          |        | <i>Crassostrea gigas</i>               | X       | X       | X       | X       | X       | +       | NIS                                                                                                                                                                                                                                                                                               |
|                 |                    |        | <i>Ostrea edulis</i>                   | X       | X       | X       |         | X       |         |                                                                                                                                                                                                                                                                                                   |
| Pterioidea      | Pinnidae           |        | <i>Atrina fragilis</i>                 | X       | X       | X       |         |         |         |                                                                                                                                                                                                                                                                                                   |
|                 |                    |        | <i>Atrina pectinata</i>                | X       |         |         |         |         |         |                                                                                                                                                                                                                                                                                                   |
| Pectinida       | Pectinidae         |        | <i>Chlamys hastata</i>                 |         |         |         |         | X       | +       |                                                                                                                                                                                                                                                                                                   |
|                 |                    |        | <i>Mimachlamys varia</i>               |         |         |         | X       | X       | X       |                                                                                                                                                                                                                                                                                                   |
| Sepiida         | Sepiidae           |        | <i>Sepia officinalis</i>               | X       | X       | X       |         |         |         |                                                                                                                                                                                                                                                                                                   |
| Teuthida        | Loliginidae        |        | <i>Loligo vulgaris</i>                 | X       | X       | X       |         |         |         |                                                                                                                                                                                                                                                                                                   |
| "Sorbeoconcha"  | Cypraeidae         |        | <i>Cribrarula exmouthensis</i>         | X       |         |         |         |         |         |                                                                                                                                                                                                                                                                                                   |
|                 | Dialidae           |        | <i>Erronea rabaulensis</i>             | X       |         |         |         |         |         |                                                                                                                                                                                                                                                                                                   |
|                 |                    |        | <i>Dialidae sp. BMOO-03134</i>         | X       |         |         |         |         |         |                                                                                                                                                                                                                                                                                                   |
|                 | Turritellidae      |        | <i>Turritella communis</i>             | X       | X       | X       |         |         |         |                                                                                                                                                                                                                                                                                                   |
| Littorinimorpha | Litorinidae        |        | <i>Echinolittorina punctata</i>        |         |         |         |         | X       | -       | NIS                                                                                                                                                                                                                                                                                               |
|                 | Hydrobiidae        |        | <i>Ecrobia maritima</i>                | X       | X       | X       |         |         |         |                                                                                                                                                                                                                                                                                                   |
| "Neogastropoda" | Pomatiopsidae      |        | <i>Neotricula aperta</i>               | X       |         |         |         |         |         | Freshwater                                                                                                                                                                                                                                                                                        |
|                 | Conidae            |        | <i>Conasprella mindana</i>             | X       |         |         |         |         |         | not in Med                                                                                                                                                                                                                                                                                        |
|                 |                    |        | <i>Conus pertusus</i>                  | X       |         |         |         |         |         | not in Med                                                                                                                                                                                                                                                                                        |
|                 |                    |        | <i>Mangelia attenuata</i>              | X       |         |         |         |         |         |                                                                                                                                                                                                                                                                                                   |
|                 | Muricidae          |        | <i>Neothais harpa</i>                  | X       |         |         |         |         |         | not in Med                                                                                                                                                                                                                                                                                        |
|                 | Mitridae           |        | <i>Domipora filaris</i>                | X       |         |         |         |         |         | not in Med                                                                                                                                                                                                                                                                                        |
|                 | Fascioliariidae    |        | <i>Amiantofusus sebalis</i>            |         |         |         | X       | X       |         | not in Med                                                                                                                                                                                                                                                                                        |
| Cephalaspidea   | Haminoeidae        |        | <i>Haminoea oratei</i>                 | X       | X       | X       |         |         |         |                                                                                                                                                                                                                                                                                                   |
|                 |                    |        | <i>Atys semistriata</i>                |         |         |         |         | X       | X       |                                                                                                                                                                                                                                                                                                   |
|                 | Retusidae          |        | <i>Retusa umbilicata</i>               | X       | X       | X       |         |         |         |                                                                                                                                                                                                                                                                                                   |
|                 | Aglajidae          |        | <i>Chelidonura inornata</i>            |         |         |         | X       | X       | -       |                                                                                                                                                                                                                                                                                                   |
| Thecosomata     | Cavoliniidae       |        | <i>Cavolinia inflexa</i>               | X       | X       | X       |         |         |         |                                                                                                                                                                                                                                                                                                   |
|                 |                    |        | <i>Creseis</i>                         |         |         |         | X       | X       |         |                                                                                                                                                                                                                                                                                                   |
|                 |                    |        | <i>Creseis clava</i>                   | X       | X       | X       |         |         |         |                                                                                                                                                                                                                                                                                                   |
|                 |                    |        | <i>Creseis virgula</i>                 | X       | X       | X       |         |         |         |                                                                                                                                                                                                                                                                                                   |
|                 |                    |        | <i>Diacria quadridentata</i>           |         |         |         |         | X       | +       | not in Med                                                                                                                                                                                                                                                                                        |
|                 | Cuvierinidae       |        | <i>Cuvierina columnella</i>            |         |         |         | X       | X       | -       |                                                                                                                                                                                                                                                                                                   |
|                 | Limacinidae        |        | <i>Heliconoides inflatus</i>           | X       | X       | X       |         |         |         |                                                                                                                                                                                                                                                                                                   |
| Nudibranchia    | Dendrodorididae    |        | <i>Dendrodoris fumata</i>              |         |         |         |         | X       | -       | NIS                                                                                                                                                                                                                                                                                               |

| Phylum | Order                | Family            | 0_NCBI TAXONOMY                   | COI 90% | COI 95% | COI 97% | 18S 95% | 18S 97% | 18S 99% | Notes (WoRMS, WRIMS, Razouls, FISHbase, literature, personal knowledge)                                                                                                                                                                                       |
|--------|----------------------|-------------------|-----------------------------------|---------|---------|---------|---------|---------|---------|---------------------------------------------------------------------------------------------------------------------------------------------------------------------------------------------------------------------------------------------------------------|
|        | Pleurobranchomorpha  | Pleurobranchidae  | <i>Pleurobranchaea meckeli</i>    | X       | X       | X       | X       | X       | X       |                                                                                                                                                                                                                                                               |
|        | "Hydrophila <snail>" | Lymnaeidae        | <i>Lymnea stagnalis</i>           | X       |         |         |         |         |         | Freshwater                                                                                                                                                                                                                                                    |
|        |                      | Planorbidae       | <i>Bulinus truncatus</i>          | X       |         |         |         |         |         | Freshwater                                                                                                                                                                                                                                                    |
|        | "Pupilloidea"        | Pyramidulidae     | <i>Pyramidula pusilla</i>         | X       |         |         |         |         |         | Freshwater                                                                                                                                                                                                                                                    |
|        | Sacoglossa           | Limapontiidae     | <i>Aplysiopsis minor</i>          |         |         |         | X       | X       | X       | Not present in Med. However, <i>A.elegans</i> was recently recorded in the Adriatic (Mavrič et al., 2014); <i>A.minor</i> (18S) and <i>A.enteromorpha</i> (COI) are the only species of the genus deposited in the NCBI Database.                             |
|        |                      |                   | <i>Ercolania viridis</i>          | X       | X       | X       |         |         |         |                                                                                                                                                                                                                                                               |
|        |                      |                   | <i>Elysia</i> sp. 3 GC-2014       | X       | X       | X       |         |         |         |                                                                                                                                                                                                                                                               |
|        |                      |                   | <i>Calliopaea bellula</i>         |         |         |         | X       | X       | +       | not in Med                                                                                                                                                                                                                                                    |
|        | "Acteonoidea"        | Acteonidae        | <i>Acteon tornatilis</i>          | X       | X       | X       | X       | X       |         |                                                                                                                                                                                                                                                               |
|        | "Vetigastropoda"     | Trochidae         | <i>Diloma concamerata</i>         | X       |         |         |         |         |         | not in Med                                                                                                                                                                                                                                                    |
|        |                      | Hubrechtidae      | <i>Hubrechtella dubia</i>         |         |         |         | X       | X       | X       |                                                                                                                                                                                                                                                               |
|        |                      | Carinomidae       | <i>Carinoma</i> sp. BOLD: ACM5178 | X       |         |         |         |         |         |                                                                                                                                                                                                                                                               |
|        |                      | Tubulanidae       | <i>Tubulanus</i> sp. MCZ IZ 45559 | X       |         |         |         |         |         |                                                                                                                                                                                                                                                               |
|        |                      |                   | <i>Callinera grandis</i>          |         |         |         | X       | X       | +       | not in Med                                                                                                                                                                                                                                                    |
|        | Heteronemertea       | Lineidae          | <i>Micrura varicolor</i>          | X       | X       | X       |         |         |         | not in Med                                                                                                                                                                                                                                                    |
|        |                      |                   | <i>Micrura</i>                    | X       | X       | X       | X       | X       |         | According to COI this MOTU belongs to <i>M.varicolor</i> , while 18S recognized it as either <i>M.ignea</i> or <i>M.fasciolata</i> . Of these only the last species is reported for the Med, while other species of this Genus are also reported for the Med. |
|        |                      |                   | <i>Riseriellus occultus</i>       | X       |         |         |         |         |         |                                                                                                                                                                                                                                                               |
|        |                      |                   | <i>Paranemertes</i>               | X       |         |         |         |         |         |                                                                                                                                                                                                                                                               |
|        | Monostilifera        | Poseidonemertidae | <i>Poseidonemertes</i>            |         |         |         | X       | X       |         |                                                                                                                                                                                                                                                               |
|        |                      | Zancleidae        | <i>Zanclea</i> sp. ZX JRH-2014    | X       |         |         |         |         |         |                                                                                                                                                                                                                                                               |
|        | Cnidaria             | Anthoathecata     | <i>Triactis producta</i>          |         |         |         | X       |         |         |                                                                                                                                                                                                                                                               |
|        |                      | Actinaria         | <i>Anemonia sulcata</i>           |         |         |         | X       | X       |         |                                                                                                                                                                                                                                                               |
|        |                      | Balellidae        | <i>Balella mirabilis</i>          | X       |         |         |         |         |         | not in Med                                                                                                                                                                                                                                                    |
|        |                      | Hydractiniidae    | <i>Clavactinia serrata</i>        |         |         |         |         |         |         | not in Med                                                                                                                                                                                                                                                    |
|        |                      | Bougainvillidae   | <i>Bougainvillia muscus</i>       | X       | X       | X       |         | X       |         |                                                                                                                                                                                                                                                               |
|        |                      |                   | <i>Garveia grisea</i>             |         |         |         |         |         |         |                                                                                                                                                                                                                                                               |
|        |                      |                   | <i>Lizzia blondina</i>            | X       | X       | X       | X       | X       |         |                                                                                                                                                                                                                                                               |
|        |                      | Halimedusidae     | <i>Tiaricodon coeruleus</i>       | X       |         |         |         |         |         | not in Med                                                                                                                                                                                                                                                    |
|        |                      | Metridiidae       | <i>Metridium senile</i>           |         |         |         |         | X       | X       |                                                                                                                                                                                                                                                               |
|        |                      | Pandeidae         | <i>Leuckartiara octona</i>        | X       | X       | X       |         | X       |         |                                                                                                                                                                                                                                                               |
|        |                      |                   | <i>Proboscidactyla ornata</i>     | X       |         |         |         |         |         | not in Med                                                                                                                                                                                                                                                    |
|        |                      | Porpitiidae       | <i>Porpita porpita</i>            |         |         |         | X       |         |         |                                                                                                                                                                                                                                                               |
|        |                      | Tubulariidae      | <i>Ectopleura</i>                 |         |         |         | X       | X       |         |                                                                                                                                                                                                                                                               |
|        |                      |                   | <i>Ectopleura dumortierii</i>     | X       | X       | X       |         |         |         |                                                                                                                                                                                                                                                               |
|        |                      | Ratkheidae        | <i>Ratkeia octopunctata</i>       |         |         |         | X       | X       |         |                                                                                                                                                                                                                                                               |
|        | Leptothecatae        | Aequoreidae       | <i>Aequorea australis</i>         | X       |         |         | X       | X       | -       | not in Med                                                                                                                                                                                                                                                    |
|        |                      |                   | <i>Aequorea macrodactyla</i>      | X       |         |         |         |         |         |                                                                                                                                                                                                                                                               |
|        |                      |                   | <i>Aequorea conica</i>            | X       |         |         |         |         |         |                                                                                                                                                                                                                                                               |
|        |                      | Blackfordiidae    | <i>Blackfordia virginica</i>      | X       |         |         | X       | X       |         |                                                                                                                                                                                                                                                               |
|        |                      | Campanulariidae   | <i>Campanularia subantarctica</i> | X       |         |         |         |         |         | not in Med                                                                                                                                                                                                                                                    |
|        |                      |                   | <i>Clytia elsaeoswaldae</i>       |         |         |         | X       |         |         | not in Med                                                                                                                                                                                                                                                    |
|        |                      |                   | <i>Clytia hemisphaerica</i>       |         |         |         | X       | X       |         |                                                                                                                                                                                                                                                               |
|        |                      |                   | <i>Clytia folleata</i>            |         |         |         |         |         |         |                                                                                                                                                                                                                                                               |
|        |                      |                   | <i>Clytia gracilis</i>            |         |         |         | X       | X       | +       | Med ?                                                                                                                                                                                                                                                         |
|        |                      |                   | <i>Clytia noliformis</i>          |         |         |         | X       |         |         |                                                                                                                                                                                                                                                               |
|        |                      |                   | <i>Clytia</i> sp. GL JRH-2014     | X       |         |         |         |         |         |                                                                                                                                                                                                                                                               |
|        |                      |                   | <i>Clytia</i> sp. KC JRH-2012     |         |         |         | X       |         |         |                                                                                                                                                                                                                                                               |
|        |                      |                   | <i>Clytia xiamenensis</i>         | X       |         |         |         |         |         | not in Med                                                                                                                                                                                                                                                    |
|        |                      |                   | <i>Eucoilota maculata</i>         |         |         |         |         |         |         |                                                                                                                                                                                                                                                               |
|        |                      |                   | <i>Eucoilota</i> sp. JRH-2014     | X       |         |         |         |         |         |                                                                                                                                                                                                                                                               |
|        |                      |                   | <i>Obelia</i>                     | X       |         |         | X       | X       | X       | According to 18S this MOTU belongs to either <i>O.dichotoma</i> or <i>O.geniculata</i> , while COI identified it as either <i>O.dichotoma</i> or an undescribed species of <i>Obelia</i> .                                                                    |
|        |                      | Eirenidae         | <i>Eirene ceylonensis</i>         | X       |         |         |         |         |         | not in Med                                                                                                                                                                                                                                                    |
|        |                      |                   | <i>Eirene brevistylus</i>         |         |         |         | X       |         |         | not in Med                                                                                                                                                                                                                                                    |
|        |                      |                   | <i>Eirene pyramidalis</i>         | X       |         |         |         |         |         | not in Med                                                                                                                                                                                                                                                    |
|        |                      |                   | <i>Eirene hexamenalis</i>         | X       |         |         |         |         |         | not in Med                                                                                                                                                                                                                                                    |
|        |                      |                   | <i>Eutima curva</i>               |         |         |         | X       | X       | +       | not in Med                                                                                                                                                                                                                                                    |

| Tab_S1        |              |                  |                                                                      |         |         |         |         |         |         |                                                                                                       |
|---------------|--------------|------------------|----------------------------------------------------------------------|---------|---------|---------|---------|---------|---------|-------------------------------------------------------------------------------------------------------|
| Phylum        | Order        | Family           | 0_NCBI TAXONOMY                                                      | COI 90% | COI 95% | COI 97% | 18S 95% | 18S 97% | 18S 99% | Notes (WoRMS, WRIMS, Razouls, FISHbase, literature, personal knowledge)                               |
|               |              |                  | <i>Eutima gracilis</i>                                               | X       | X       | X       |         |         |         |                                                                                                       |
|               |              |                  | <i>Eutonina indicans</i>                                             |         |         |         |         |         |         |                                                                                                       |
|               |              |                  | <i>Helgicirrha schulzii</i>                                          | X       | X       | X       |         |         |         |                                                                                                       |
|               |              | Plumulariidae    | <i>Plumularia setacea</i>                                            | X       |         |         |         |         |         |                                                                                                       |
|               |              | Sugiuridae       | <i>Sugiura chengshanense</i>                                         | X       |         |         |         |         |         |                                                                                                       |
| Actiniaria    |              | Actiniidae       | <i>Bunodosoma granuliferum</i>                                       |         |         |         |         | X       | -       | not in Med                                                                                            |
|               |              | Diadumenidae     | <i>Diadumene lineata</i>                                             | X       |         |         |         |         |         |                                                                                                       |
|               |              | Sagartiidae      | <i>Sagartiogeton undatus</i>                                         |         |         |         |         | X       |         |                                                                                                       |
| Siphonophora  |              | Clausophyidae    | <i>Chuniphyes multidentata</i>                                       | X       |         |         |         |         |         |                                                                                                       |
|               |              | Prayidae         | <i>Gilia reticulata</i>                                              |         |         |         | X       | X       |         |                                                                                                       |
|               |              |                  | <i>Lilyopsis medusa</i>                                              |         |         |         | X       | X       | +       |                                                                                                       |
|               |              | Agalmatidae      | <i>Marrus sp. 1 BO-2009</i>                                          | X       |         |         |         |         |         | not in Med                                                                                            |
|               |              |                  | <i>Nanomia bijuga</i>                                                | X       | X       | X       |         |         |         |                                                                                                       |
|               |              | Apolemidae       | <i>Apolemia sp. 1 YPM 35035</i>                                      | X       |         |         |         |         |         |                                                                                                       |
|               |              | Diphyinae        | <i>Muggiaea atlantica</i>                                            | X       | X       | X       |         |         |         |                                                                                                       |
|               |              |                  | <i>Lensia campanella</i>                                             |         |         | X       |         |         |         |                                                                                                       |
| Narcomedusae  |              | Aeginidae        | <i>Solmundella bitentaculata</i>                                     |         |         |         | X       | X       | +       | not in Med                                                                                            |
| Trachymedusae |              | Geryoniidae      | <i>Liriope tetraphylla</i>                                           | X       |         |         | X       | X       |         |                                                                                                       |
|               |              | Rhopalonematidae | <i>Aglantha digitale</i>                                             |         |         |         | X       | X       |         |                                                                                                       |
|               |              |                  | <i>Aglaura hemistoma</i>                                             |         |         |         |         | X       | +       |                                                                                                       |
|               |              |                  | <i>Rhopalonema velatum</i>                                           |         |         |         |         | X       | X       |                                                                                                       |
|               |              | Rhizostomeae     | <i>Nemopilema nomurai</i>                                            | X       |         |         |         |         |         |                                                                                                       |
|               |              |                  | <i>Rhizostoma pulmo</i>                                              | X       | X       | X       | X       | X       |         |                                                                                                       |
| Limnomedusae  |              | Olindiidae       | <i>Aglauropsis aeora</i>                                             |         |         |         |         |         |         |                                                                                                       |
|               |              | Alcyonacea       | <i>Junceella fragilis</i>                                            | X       |         |         | X       | X       | +       | not in Med                                                                                            |
| Porifera      |              | Bubarida         | <i>Scopalina ruetzleri</i>                                           | X       |         |         |         |         |         |                                                                                                       |
|               |              | Clionaida        | <i>Spirastrella</i>                                                  |         |         |         | X       | X       | X       |                                                                                                       |
|               |              | Haplosclerida    | <i>Haliclona amboinensis</i>                                         | X       |         |         |         |         |         |                                                                                                       |
|               |              | Tethyida         | <i>Axos cliftoni</i>                                                 | X       |         |         |         |         |         | not in Med                                                                                            |
| Ctenophora    |              | Beroidea         | <i>Beroe</i>                                                         |         |         |         | X       | X       | +       |                                                                                                       |
|               |              | Cyrtippida       | <i>Mertensia ovum</i> /Undescribed mertensiid/ <i>Euplokamis sp.</i> |         |         |         | X       | X       | X       | <i>Martensia ovum</i> is not present in the Med, while other Martensiids are known to be present here |
|               |              | Mertensiidae     | <i>Charistephane fugiens</i>                                         | X       |         |         |         |         |         |                                                                                                       |
|               |              | Lampocteridae    | <i>Lampocteis cruentiventer</i>                                      |         |         |         | X       | X       | +       | not in Med (Pacific)                                                                                  |
|               |              | Pleurobrachidae  | <i>Pleurobrachia pileus</i>                                          |         |         |         |         | X       | +       |                                                                                                       |
| Gastrotricha  | Macrodasyida | Macrodasyidae    | <i>Urodasys sp. 114a</i>                                             | X       | X       | X       |         |         |         |                                                                                                       |

Table S1. Exhaustive list of taxa recovered at the minimum similarity thresholds of 90%, 95% and 97% for both genes and 99% for 18S only. A plausible misidentification is highlighted in blue, a non-indigenous species (NIS) is in red and a discarded species is in pink. Matches represented by singletons are marked in grey.

|                              | Taxa                              | Morphology | Metabarcoding | COI | 18S |
|------------------------------|-----------------------------------|------------|---------------|-----|-----|
| <b>Cladocera</b>             | <i>Evadne nordmanni</i>           | x          |               |     |     |
|                              | <i>Evadne spinifera</i>           | x          | x             | x   | x   |
|                              | <i>Penilia avirostris</i>         | x          | x             | x   | x   |
|                              | <i>Pleopis polyphemoides</i>      | x          | x             | x   |     |
|                              | <i>Podon intermedius</i>          | x          | x             | x   |     |
|                              | <i>Pseudevadne tergestina</i>     | x          |               | x   |     |
| <b>Copepoda</b>              | <i>Acartia (Acartiura) clausi</i> | x          | x             | x   | x   |
|                              | <i>Acartia negligens</i>          | x          |               |     |     |
|                              | <i>Acartia longiremis</i>         | x          |               |     |     |
|                              | <i>Calanus finmarchicus</i>       |            | x             |     | x   |
|                              | <i>Calanus helgolandicus</i>      | x          | x             | x   | x   |
|                              | <i>Calocalanus contractus</i>     | x          | x             | x   |     |
|                              | <i>Calocalanus plumulosus</i>     | x          |               |     |     |
|                              | <i>Calocalanus styliremis</i>     | x          |               |     |     |
|                              | <i>Candacia armata</i>            |            | x             |     | x   |
|                              | <i>Candacia giesbrechti</i>       | x          |               |     |     |
|                              | <i>Centropages kroyeri</i>        | x          |               |     |     |
|                              | <i>Clausocalanus arcuicornis</i>  | x          | x             | x   |     |
|                              | <i>Clausocalanus furcatus</i>     | x          | x             | x   |     |
|                              | <i>Clausocalanus jobei</i>        | x          | x             | x   |     |
|                              | <i>Clausocalanus parapergens</i>  | x          |               | x   |     |
|                              | <i>Clausocalanus paululus</i>     | x          | x             | x   |     |
|                              | <i>Clausocalanus pergens</i>      | x          | x             | x   |     |
|                              | <i>Ctenocalanus vanus</i>         | x          | x             | x   |     |
|                              | <i>Copilia quadrata</i>           | x          |               |     |     |
|                              | <i>Diaixis hibernica</i>          |            | x             | x   |     |
|                              | <i>Diaixis pygmaea</i>            | x          |               |     |     |
|                              | <i>Ditrichocorycaeus brehmi</i>   | x          |               |     |     |
|                              | <i>Euterpina acutifrons</i>       | x          | x             | x   | x   |
|                              | <i>Farranula</i>                  | x          |               |     |     |
|                              | <i>Goniopsyllus rostratus</i>     | x          | x             | x   |     |
|                              | <i>Haloptilus longicornis</i>     | x          |               |     |     |
|                              | <i>Isias clavipes</i>             | x          |               |     | x   |
|                              | <i>Mecynocera clausi</i>          | x          |               |     |     |
|                              | <i>Mesocalanus tenuicornis</i>    | x          | x             | x   | x   |
|                              | <i>Microcalanus</i>               |            | x             | x   |     |
|                              | <i>Microsetella norvegica</i>     | x          |               |     |     |
|                              | <i>Microsetella rosea</i>         | x          |               |     |     |
|                              | <i>Nannocalanus minor</i>         | x          | x             | x   |     |
|                              | <i>Neocalanus gracilis</i>        | x          |               |     |     |
|                              | <i>Oithona nana</i>               | x          | x             |     | x   |
|                              | <i>Oithona plumifera</i>          | x          |               |     |     |
|                              | <i>Oithona setigera</i>           | x          |               |     |     |
|                              | <i>Oithona similis</i>            | x          | x             | x   | x   |
|                              | <i>Oncaea curta</i>               | x          |               |     |     |
|                              | <i>Oncaea media</i>               | x          |               |     |     |
| <i>Oncaea mediterranea</i>   | x                                 | x          | x             |     |     |
| <i>Oncaea scottodicarloi</i> |                                   | x          | x             |     |     |
| <i>Oncaea venusta</i>        | x                                 | x          | x             | x   |     |
| <i>Oncaea waldemari</i>      |                                   | x          | x             |     |     |

| <b>Taxa</b>                    | <b>Morphology</b> | <b>Metabarcoding</b> | <b>COI</b> | <b>18S</b> |
|--------------------------------|-------------------|----------------------|------------|------------|
| <i>Paracalanus denudatus</i>   | x                 |                      |            |            |
| <i>Paracalanus nanus</i>       | x                 |                      | x          |            |
| <i>Paracalanus indicus</i>     |                   | x                    | x          |            |
| <i>Paracalanus parvus</i>      | x                 | x                    | x          | x          |
| <i>Paracalanus quasimodo</i>   |                   | x                    | x          |            |
| <i>Paraeuchaeta hebes</i>      | x                 | x                    | x          |            |
| <i>Pleuromamma gracilis</i>    | x                 | x                    | x          |            |
| <i>Pleuromamma robusta</i>     |                   | x                    |            | x          |
| <i>Pseudocalanus elongatus</i> |                   | x                    | x          | x          |
| <i>Pseudocalanus moultoni</i>  |                   | x                    |            | x          |
| <i>Pseudodiaptomus marinus</i> | x                 | x                    | x          | x          |
| <i>Sapphirina</i>              | x                 |                      |            |            |
| <i>Temora longicornis</i>      | x                 | x                    | x          |            |
| <i>Temora stylifera</i>        | x                 | x                    | x          |            |
| <i>Triconia dentipes</i>       | x                 |                      |            |            |
| <i>Triconia umerus</i>         |                   | x                    | x          |            |
| <i>Tritia</i>                  |                   | x                    | x          |            |

Table S2. List of taxa identified by morphological and/or DNA metabarcoding approaches (COI and 18S).

| Station | cruise     | Date      | time  | Latitude N | Longitude E | Depth |
|---------|------------|-----------|-------|------------|-------------|-------|
| 4       | Echosurvey | 8/27/2014 | 09:57 | 43°48.43   | 13°09.75    | 13.0  |
| 6       | Echosurvey | 8/27/2014 | 13:47 | 44°00.28   | 13°23.92    | 61.4  |
| 8       | Echosurvey | 8/27/2014 | 15:58 | 44°12.56   | 13°38.67    | 63.8  |
| 12      | Echosurvey | 8/29/2014 | 23:13 | 44°29.993  | 13°08.026   | 41.4  |
| 14      | Echosurvey | 8/30/2014 | 01:48 | 44°18.81   | 12°52.90    | 41.8  |
| 16      | Echosurvey | 8/30/2014 | 04:12 | 44°07.47   | 12°37.54    | 11.0  |
| 20      | Echosurvey | 8/30/2014 | 17:03 | 44°30.14   | 12°23.87    | 13.0  |
| 22      | Echosurvey | 8/30/2014 | 20:53 | 44°39.14   | 12°45.49    | 34.6  |
| 24      | Echosurvey | 8/30/2014 | 23:14 | 44°47.34   | 13°05.83    | 40.0  |
| 25      | Echosurvey | 8/31/2014 | 02:30 | 44°42.526  | 12°26.790   | 21.0  |
| 26      | Echosurvey | 8/31/2014 | 04:41 | 44°55.236  | 12°35.155   | 16.3  |
| 28      | Echosurvey | 8/31/2014 | 08:05 | 44°58.47   | 13°04.76    | 35.0  |
| 30      | Echosurvey | 9/1/2014  | 12:42 | 45°40.00   | 13°32.88    | 16.0  |
| 32      | Echosurvey | 9/1/2014  | 15:26 | 45°34.41   | 13°42.05    | 18.0  |
| 33      | Echosurvey | 9/1/2014  | 17:11 | 45°33.01   | 13°34.33    | 22.0  |
| 35      | Echosurvey | 9/1/2014  | 21:43 | 45°43.06   | 13°39.52    | 16.5  |
| 36      | Echosurvey | 9/2/2014  | 00:25 | 45°39.24   | 13°13.65    | 14.3  |
| 37      | Echosurvey | 9/2/2014  | 01:26 | 45°32.77   | 13°18.58    | 20.7  |
| 38      | Echosurvey | 9/2/2014  | 04:31 | 45°31.306  | 12°50.636   | 17.0  |
| 40      | Echosurvey | 9/4/2014  | 17:17 | 45°22.96   | 13°07.50    | 28.6  |
| 41      | Echosurvey | 9/4/2014  | 18:19 | 45°15.84   | 13°03.02    | 31.0  |
| 42      | Echosurvey | 9/4/2014  | 20:35 | 45°27.82   | 12°41.73    | 19.0  |
| 43      | Echosurvey | 9/4/2014  | 21:36 | 45°22.99   | 12°32.77    | 19.0  |
| 44      | Echosurvey | 9/5/2014  | 06:46 | 45°16.65   | 12°46.75    | 27.0  |
| 45      | Echosurvey | 9/5/2014  | 10:04 | 45°15.12   | 12°24.53    | 21.0  |
| 46      | Echosurvey | 9/5/2014  | 11:24 | 45°05.30   | 12°26.24    | 22.6  |
| 48      | Echosurvey | 9/5/2014  | 14:29 | 45°09.41   | 12°43.63    | 30.6  |
| 50      | Echosurvey | 9/5/2014  | 16:22 | 45°07.46   | 13°02.13    | 34.3  |
| 52      | Echosurvey | 9/7/2014  | 14:46 | 43°38.79   | 13°35.79    | 19.8  |
| 54      | Echosurvey | 9/7/2014  | 16:47 | 43°46.51   | 13°53.58    | 74.6  |
| 56      | Echosurvey | 9/7/2014  | 18:46 | 43°53.72   | 14°10.42    | 72.4  |
| 58      | Echosurvey | 9/8/2014  | 07:52 | 43°27.99   | 14°32.92    | 88.8  |
| 60      | Echosurvey | 9/8/2014  | 11:25 | 43°19.97   | 14°13.29    | 75.3  |
| 62      | Echosurvey | 9/8/2014  | 13:49 | 43°11.37   | 13°52.36    | 14.5  |
| 65      | Echosurvey | 9/9/2014  | 04:20 | 42°41.47   | 14°04.70    | 14.8  |
| 66      | Echosurvey | 9/9/2014  | 08:44 | 42°45.72   | 14°18.42    | 87.6  |
| 67      | Echosurvey | 9/9/2014  | 10:28 | 42°49.88   | 14°32.25    | 206.4 |
| 70      | Echosurvey | 9/9/2014  | 23:24 | 42°39.26   | 15°18.26    | 135.0 |
| 73      | Echosurvey | 9/10/2014 | 02:26 | 42°28.74   | 14°56.62    | 154.6 |
| 76      | Echosurvey | 9/10/2014 | 06:45 | 42°18.09   | 14°34.39    | 22.3  |
| 79      | Echosurvey | 9/10/2014 | 21:41 | 41°58.89   | 15°06.13    | 17.1  |
| 82      | Echosurvey | 9/11/2014 | 00:53 | 42°13.66   | 15°31.24    | 115.0 |
| 85      | Echosurvey | 9/11/2014 | 04:06 | 42°27.61   | 15°55.25    | 129.7 |
| 89      | Echosurvey | 9/13/2014 | 14:12 | 41°58.79   | 16°02.99    | 21.0  |
| 90      | Echosurvey | 9/13/2014 | 16:30 | 42°09.73   | 16°17.13    | 127.5 |
| 94      | Echosurvey | 9/16/2014 | 12:03 | 42°41.50   | 14°04.68    | 15.3  |

Table S3. Details of the position of the stations, date of sampling and respective depths in metres.
